1 **Integrating genetic data in target trial emulations improves their design and**  
2 **informs the value of polygenic scores for prognostic and predictive enrichment**

3  
4 Jakob German<sup>1,2</sup>, Zhiyu Yang<sup>1</sup>, Sarah Urbut<sup>3,4,5</sup>, Pekka Vartiainen<sup>1,6</sup>, FinnGen, Pradeep  
5 Natarajan<sup>4,7,8,9</sup>, Elisabetta Pattorno<sup>5,10</sup>, Zoltan Kutalik<sup>11,12,13</sup>, Anthony Philippakis<sup>2,14,+</sup>, Andrea  
6 Ganna<sup>1,15,+</sup>

7  
8 + These authors jointly supervised the project

9 1. Institute for Molecular Medicine Finland (FIMM), University of Helsinki, Helsinki, Finland;

10 2. Eric and Wendy Schmidt Center, Broad Institute of MIT and Harvard, Cambridge, MA,  
11 USA, 02142;

12 3. Division of Cardiovascular Medicine, Massachusetts General Hospital, Boston, MA;

13 4. Center for Genomic Medicine Massachusetts General Hospital, Boston, MA;

14 5. Cardiovascular Research Center, Massachusetts General Hospital, Boston, MA;

15 6. Pediatric Research Center, Helsinki University Hospital and University of Helsinki,  
16 Helsinki, Finland;

17 7. Program in Medical & Population Genetics, Broad Institute of MIT and Harvard,  
18 Cambridge, MA, USA;

19 8. Personalized Medicine, Mass General Brigham, Boston, MA, USA;

20 9. Department of Medicine, Harvard Medical School, Boston, MA, USA;

21 10. Division of Pharmacoepidemiology and Pharmacoeconomics, Department of Medicine,  
22 Brigham and Women's Hospital and Harvard Medical School, Boston, MA;

23 11. University Center for Primary Care and Public Health, Lausanne, Switzerland;

24 12. Department of Computational Biology, University of Lausanne, Lausanne, Switzerland;

25 13. Swiss Institute of Bioinformatics, Lausanne, Switzerland;

26 14. Broad Institute of MIT and Harvard, Cambridge, MA, USA;

27 15. Analytic & Translational Genetics Unit, Massachusetts General Hospital, Harvard  
28 Medical School, Boston, MA, USA

29

30 Correspondence to Andrea Ganna ([andrea.ganna@helsinki.fi](mailto:andrea.ganna@helsinki.fi)).

31

## 32 Abstract

33 Randomized controlled trials (RCTs) are the gold standard for evaluating the efficacy and safety  
34 of medical interventions but ethical, practical, and financial limitations often necessitate decisions  
35 based on observational data. The increasing volume of such data has prompted regulatory bodies  
36 to rely more on real-world evidence, primarily obtained through trial emulations. This study  
37 explores how genetic data can improve the design of both emulated and traditional trials. We  
38 successfully emulated four major cardiometabolic RCTs within FinnGen (N=425 483) and showed  
39 how reduced differences in polygenic scores (PGS) between trial arms track improved study  
40 design and consequently reduced residual confounding. Complementing these results with  
41 simulations, we show that PGS cannot be directly used to adjust for residual or unmeasured  
42 confounding. Instead, we propose an approach that uses genetic instruments for confounding  
43 detection and apply this approach to identify likely confounders in Empareg trial emulation. Finally,  
44 our results suggest that trial emulations can inform the practical application of PGS in RCTs,  
45 potentially improving statistical power. Such prognostic enrichment strategies need to be  
46 assessed in a trial-relevant population, and we show that, for 2 out of 4 emulated trials, the  
47 association between PGS and trial outcomes in the general population was different from what  
48 observed in the population included in the trial.

49 In conclusion, our work shows that genetic information can improve the design of emulated trials.  
50 These results contribute to the establishment of a promising new era of genetically-informed  
51 clinical trials.

52

## 53 Introduction

54 When they are available, randomized controlled trials (RCT) are the gold standard to evaluate the  
55 comparative efficacy and safety of medical interventions.<sup>1</sup> Randomization ensures that the  
56 interventional and non-interventional groups are closely comparable in their characteristics, thus  
57 allowing any observed effects to be causally linked to the treatment under investigation. In many  
58 real-world scenarios, however, RCT data are not available, and decisions need to be made based  
59 on the data at hand.

60  
61 As the volume of observational data continues to grow exponentially, regulatory bodies such as  
62 the U.S. Food and Drug Administration (FDA) or the European Medicines Agency (EMA) are  
63 increasingly inclined to utilize real-world evidence to gain insights into the effectiveness of medical  
64 interventions in clinical practice.<sup>2,3</sup> Trial emulations based on real-world datasets are being  
65 increasingly leveraged to this purpose, with ongoing attempts to compare their results with  
66 findings from RCTs.<sup>4-6</sup> However, trial emulations can be biased, and traditional epidemiological  
67 limitations of observational analyses, including the exchangeability assumption (“no unmeasured  
68 confounding”) remain.<sup>7-9</sup> Residual and unmeasured confounding pose potential threats to the  
69 validity of epidemiological studies.<sup>10</sup>

70  
71 Trial emulations are typically based on claims or registry data that have detailed information on  
72 drug prescription and, importantly, purchases, ensuring accurate tracking of patient medication  
73 use. These datasets are large but not deep. They do not capture comprehensive biological  
74 information such as genomics and proteomics. Biobank studies, on the contrary, are rich of -omics  
75 information, but so far, there have been limited efforts to emulate trials within biobanks.<sup>11,12</sup> The  
76 main reasons are the small sample size and the difficulty to link them with claims data, especially  
77 in the US.

78  
79 Yet, integrating genetic data, alongside comprehensive registry information and expert  
80 knowledge, offers a distinctive opportunity to improve trial emulation. For example, genetics offers  
81 the opportunity to augment clinical trial design by identifying individuals based on higher risk of  
82 disease (‘prognostic enrichment’), or increased probability of benefit (‘predictive enrichment’).<sup>13</sup>  
83 Further exploration of this concept within a trial emulation setting could pave the way for its  
84 implementation in subsequent RCTs. For example, trial emulations can be used to understand if  
85 polygenic scores can be used for prognostic enrichment within a study population selected with

86 similar inclusion and exclusion criteria as for the RCT, rather than in the general population, as  
87 routinely done.<sup>14</sup>

88

89 Genetic information is also unique when compared to data available in claims datasets. Genetic  
90 information is stable across life, it is not impacted by reverse causation and has low measurement  
91 errors. Thousands of genetic variants have been associated with almost every possible  
92 measurable human trait creating a unique catalog of genotype-phenotype relationships.  
93 Analogously to the common use of e.g. socioeconomic or behavioral indicators as proxy variables  
94 for unmeasured confounders, using polygenic scores (PGS) as proxy measures for unobserved  
95 variables might represents an opportunity to overcome the challenge of accounting for  
96 confounding variables that are absent from the dataset.<sup>15-17</sup>

97

98 Moreover, genetic differences among treatment groups in an emulated trial could potentially offer  
99 insights into residual confounding effects. Utilizing genetic variants as instrumental variables in a  
100 Mendelian Randomization (MR) analysis<sup>18,19</sup> can help to understand the effect of a potential  
101 confounder on the treatment, as well as on the trial outcome at different stages of the emulation  
102 process. Genetic information is thus an attractive tool for causal inference and can be used,  
103 similar to what has been suggested for other causal inference approaches<sup>17,20</sup>, to identify  
104 unmeasured confounding risks.

105

106 In this study, we emulate four cardiometabolic RCTs within FinnGen<sup>21</sup>, a Finnish biobank-based  
107 study including 425 483 individuals with extensive linkage to drug purchases and other health  
108 records data. Leveraging both real data and simulations, we propose new applications of genetics  
109 to detect and mitigate confounding risks in trial emulations. Finally, we show how trial emulations  
110 within biobanks can inform on the value of PGS for prognostic and predictive enrichment in RCT.

111

## 112 Results

### 113 Successful emulation of four major cardiometabolic RCTs in FinnGen

114 We consider four large cardiometabolic RCTs, two (EMPA-REG OUTCOME<sup>22</sup> [Empareg], and  
115 TECOS<sup>23</sup> [Tecos]) focused on type 2 diabetes (T2D) patients and two (ARISTOTLE<sup>24</sup> [Aristotle]  
116 and ROCKET-AF<sup>25</sup> [Rocket]) on patients with atrial fibrillation (AF). Briefly, Empareg established  
117 that empagliflozin, a SGLT-2 inhibitor, was associated with a significantly lower risk of  
118 cardiovascular events, represented by the composite endpoint 3-point Major Adverse  
119 Cardiovascular Events (3P-MACE). Tecos demonstrated that sitagliptin, a DPP4-inhibitor, was  
120 non-inferior to usual care for T2D without sitagliptin, with no significant difference in  
121 cardiovascular outcomes, as measured by 3P-MACE, thereby confirming the null hypothesis.  
122 Aristotle showed that AF patients at increased risk for stroke using apixaban had lower risk of  
123 stroke or systemic embolism compared to warfarin users. Among a similar patient population,  
124 Rocket showed lower risk of stroke or systemic embolism among rivaroxaban versus warfarin  
125 use.

126  
127 We closely replicated these four RCTs in FinnGen, a Finnish biobank study, using the trial  
128 emulation framework (**Figure 1**) used by the RCT-DUPLICATE initiative<sup>26</sup>, a major trial replication  
129 initiative that systematically evaluates the feasibility of using real-world evidence to emulate RCTs  
130 and assess the concordance of their findings. Patient characteristics for each trial can be found  
131 in the **Supplementary Table 1**, **Supplementary Figure 1** and **Supplementary Tables 2-3**  
132 contain study design and event rate comparisons between the original RCTs and our emulations.  
133 On average, the number of individuals included in the emulated RCTs was smaller than the  
134 original trials, with reductions ranging from 36% in the EMPA-REG trial to lower percentages in  
135 others, reflecting the large sample sizes typically required for such studies. Despite a considerable  
136 number of individuals meeting the inclusion and exclusion criteria, a substantial drop in sample  
137 size occurred during 1:1 propensity score nearest-neighbor matching (e.g., N=13,677 eligible  
138 individuals in EMPA-REG, reduced to N=4,522 after matching).

139  
140 For all four emulated RCTs the hazard ratio estimates were within the 95% CI of the original  
141 RCT's estimate and aligned with the same direction of the effect. Thus, according to this definition,  
142 and similar to what was done by the RCT-DUPLICATE initiative, all four trials were "successfully"  
143 emulated. However, in Rocket, Rivaroxaban was not significantly associated with a lower risk of  
144 the composite endpoint stroke/systemic embolism compared to Warfarin (HR = 0.88; 95% CI=

145 0.57-1.36) whereas the original trial observed a significant risk reduction (HR = 0.79; 95% CI=  
 146 0.66-0.96).  
 147  
 148

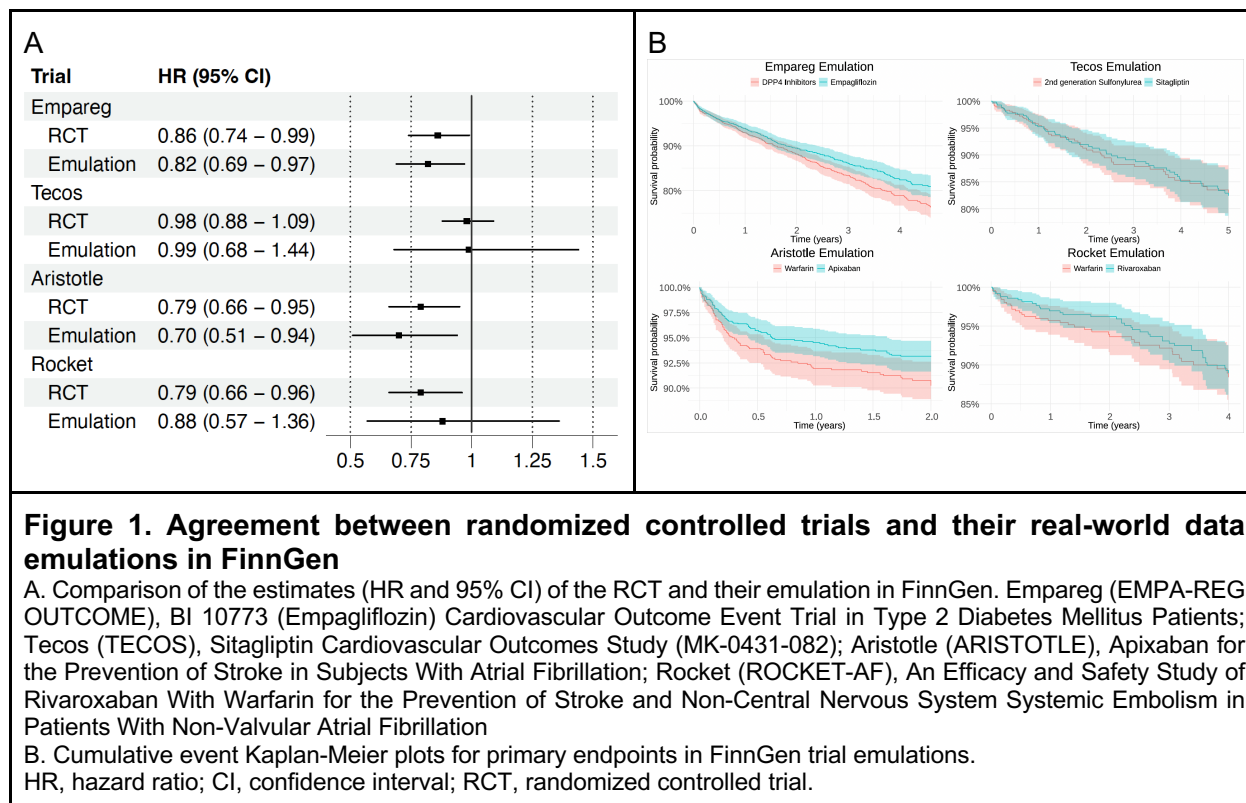

149  
 150 Differences in polygenic scores between trial arms capture emulated  
 151 trials reduction in residual confounding compared to naïve approaches  
 152  
 153 Having emulated 4 RCTs in FinnGen, we assess whether genetic information could be used to  
 154 evaluate the robustness of the emulation approach with regards to confounding  
 155 As observational data is not randomized, confounding by indication is a major challenge in  
 156 observational studies of medications. It occurs when the condition that prompts the prescription  
 157 of a drug is the true cause of the outcome being studied. For instance, doctors may choose a  
 158 specific drug based on patient characteristics (such as the severity of the disease or potential for  
 159 adverse reactions), which are not always fully captured in the data. These characteristics can  
 160 influence the outcome independently of the medication itself. As a result, differences in outcomes

161 between patients on different drugs may be due to underlying differences in patient  
162 characteristics, rather than the effects of the drugs.

163 To alleviate this bias, emulated RCTs employ a series of precautions, from choosing a sensible  
164 comparator group, closely mimicking the trial outcome definition to matching individuals for  
165 potential confounders.<sup>27</sup> However, not all factors considered when prescribing a drug over a  
166 comparator are captured in the data. For example, claims data are often poor in capturing  
167 laboratory markers. However, genetic information can be used to proxy, albeit imprecisely, many  
168 of these biological traits that are not available in observational data.

169  
170 With this goal in mind, we computed PGSs for 20 traits relevant to cardiometabolic diseases that  
171 might capture potential confounders. Some of these traits (e.g coronary heart disease) are directly  
172 available in the observational data, and thus matched upon in the emulated trial, others (e.g. C-  
173 reactive protein) are not available, as FinnGen currently does not contain information on lab  
174 measurements. We examined the genetic differences between the trial arms across different  
175 stages of the emulation process with the expectation that, by implementing increasing precautions  
176 against bias, the differences in genetically-inferred factors between the trial arms would reduce.  
177 Overall, we observed a decreasing trend in genetic differences the higher the level of confounder  
178 adjustment (**Figure 2** for Empareg and **Supplementary Figures 2-4** for the other RCTs). In  
179 Empareg, we saw a higher imbalance across all PGS in the plain observational setting comparing  
180 empagliflozin with non-initiators, which reflects the original RCT design (Empareg vs placebo).  
181 We see a particularly high imbalance in the genetically-predicted T2D (standardized mean  
182 differences (SMD) = 0.56; 95% CI = 0.54 - 0.57), glycated hemoglobin (HbA1c) (SMD = 0.31;  
183 95% CI = 0.30 - 0.33) and BMI (SMD = 0.21; 95% CI = 0.19 - 0.22) reflecting characteristics of  
184 the patient population using empagliflozin. After applying eligibility criteria and considering a  
185 sensible comparator group (DPP4 inhibitors users) instead of non-initiators, the PGS differences  
186 were overall reduced, but for 7 out of 20 PGS remained statistically significant different between  
187 the two arms at a P-value  $< 2.5 \times 10^{-3}$ , including for coronary heart disease (SMD = 0.12; 95%  
188 CI= 0.08 - 0.15) and T2D (SMD = 0.08; 95% CI= 0.04 - 0.12). Of note, only T2D patients were  
189 included in the RCT emulation stage. Thus, the remaining difference in genetically-predicted T2D  
190 likely reflects the difference in liability or risk for T2D between the two arms, which can simply be  
191 captured by T2D diagnostic codes.

192 After 1:1 propensity score nearest-neighbor matching for 26 to 30 covariates, differences were  
193 further reduced, and none was significantly different at a P-value  $< 2.5 \times 10^{-3}$ .

194 For the other three emulated RCTs, we observed similar trends (**Supplementary Figures 2-4**).  
195 Larger PGS differences in the plain observational analysis were observed for non-active  
196 comparator RCT (Tecos) vs active-comparator RCTs (Aristotle and Rocket).

197  
198

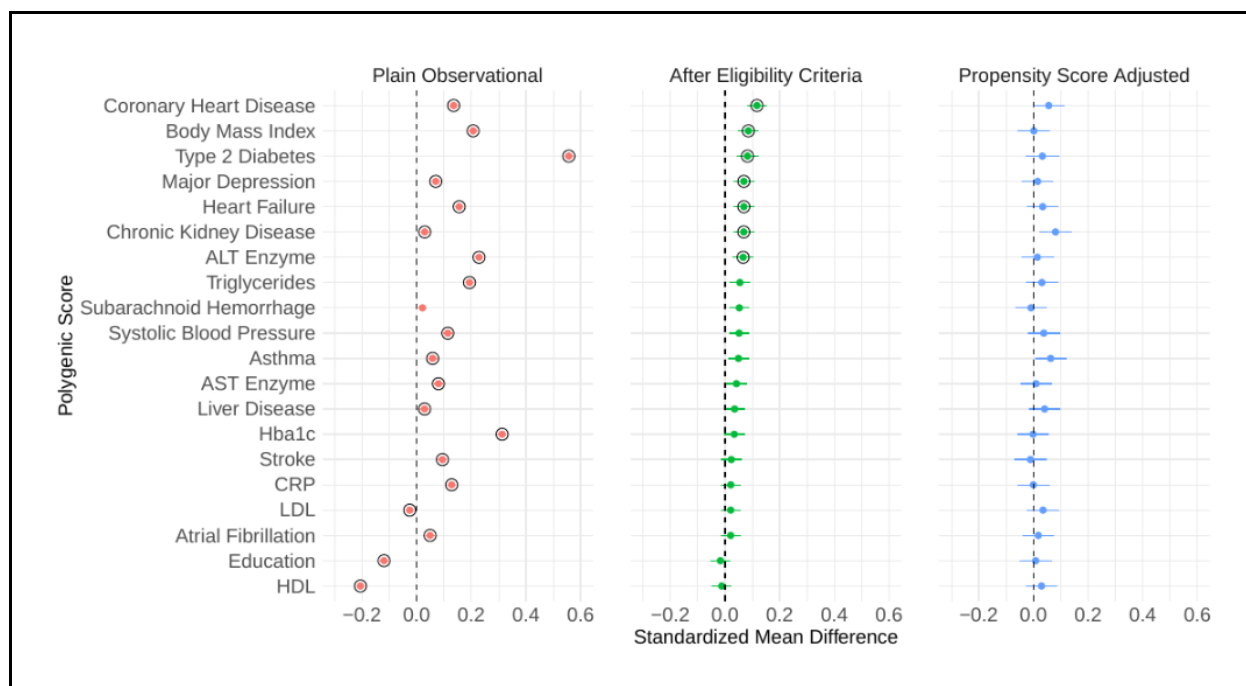

**Figure 2. Standardized mean difference of 20 polygenic scores across different stages of the Empareg trial emulation**

Plain Observational: empagliflozin initiators vs non-initiators; After Eligibility Criteria: Empareg trial emulation cohort after applying inclusion/exclusion criteria and including an active comparator group (DPP4 inhibitors user). The comparison is between empagliflozin initiators vs DPP4 initiators; Propensity Score Adjusted: Empareg trial emulation cohorts after with inclusion/exclusion criteria and a 1:1 propensity score nearest-neighbor matching for 28 covariates. The comparison is between empagliflozin initiators vs DPP4 initiators.

The standardized differences in means of the two trial arms are plotted as point estimates and lines representing their 95% CI. A circle around the point estimates represents statistical significance after a Bonferroni-corrected P value threshold ( $2.5 \times 10^{-3}$ ).

Analogous plots for the other trial emulations can be found in the **Supplementary Figures 2-4**

ALT, alanine transaminase; AST, aspartate transaminase; Hba1c, glycated hemoglobin A1c; CRP, C-reactive protein; LDL, low-density lipoprotein; HDL, high-density lipoprotein; CI, confidence interval.

199  
200 Polygenic scores are unlikely to help controlling for confounding in  
201 emulated trials

202  
203 Having established that PGS differences between trial arms track the level of confounder  
204 adjustment, one might speculate that directly controlling for PGS in an emulated trial, for example



205 via propensity score-matching, can help reduce confounders for traits that have not been directly  
206 measured.

207

208 To better understand this scenario, we constructed directed acyclic graphs<sup>28</sup> (DAG) and  
209 performed simulation studies. The DAG in **Figure 3A** lays out the graphical relationship between  
210 treatment, outcome, confounder and PGS assuming PGS is directly causal only to the  
211 confounder. Similar to other approaches that use proxy measures for unobserved confounding  
212 adjustment<sup>17</sup>, if the PGS was a strongly-predictive causal instrument for the confounder, one  
213 might consider adjusting for PGS when the confounder is not available.

214 However, several aspects do not support this claim. The first observation is that while PGS is  
215 constructed to predict the confounder it can still be associated with both treatment and/or outcome  
216 independent from the confounder. This is because the PGS is a weighted sum of the effects of  
217 multiple genetic variants, some of which can be associated with treatment and/or outcome  
218 independently of their effect on the confounder (horizontal pleiotropy). We illustrate this possibility  
219 with the DAG and simulations in **Supplementary Figure 5**. Thus, controlling for PGS might induce  
220 bias by controlling for other non-confounding factors, including mediators.

221 The second observation is that PGS are generally weak predictors of traits and diseases.<sup>29,30</sup>  
222 Thus, adjusting for PGS would only adjust for part of the variability in the confounders. Under  
223 realistic correlation between PGS and the confounder ( $r^2$  between 0.01 and 0.5) and different  
224 magnitude of confounding effect, PGS alone is unlikely to be able to adjust for residual  
225 confounding (**Figure 3B** and **Supplementary Figure 6**).

226

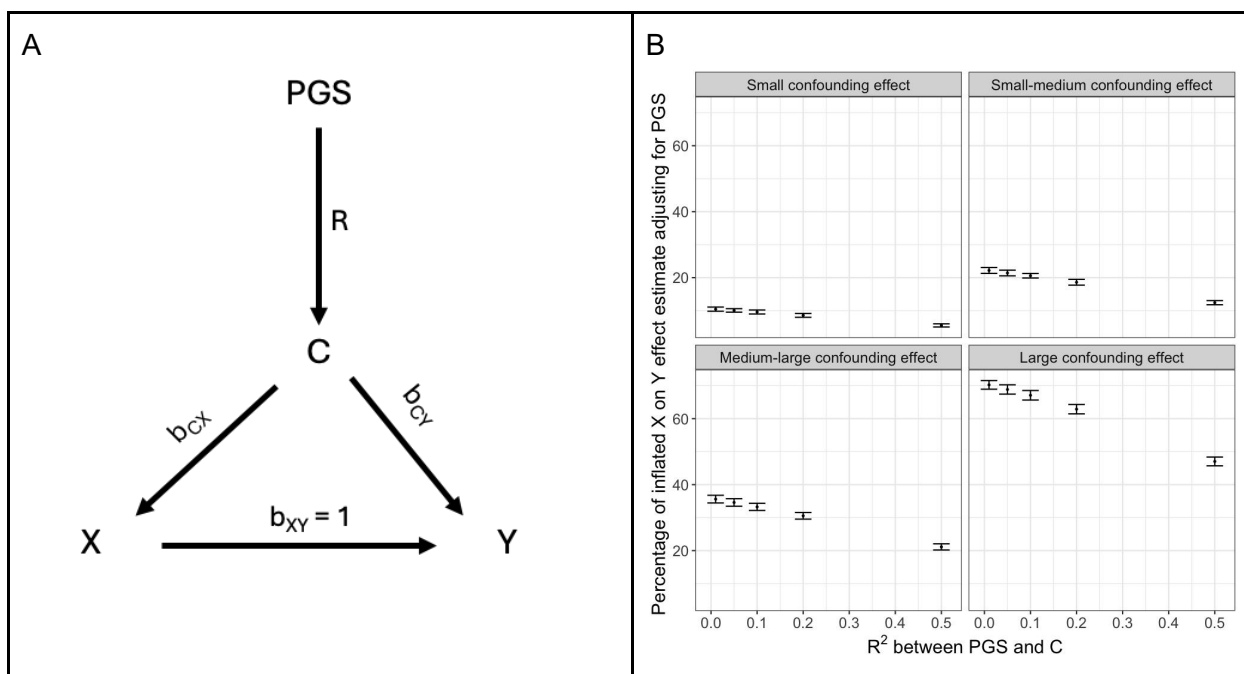

### Figure 3. Evaluating the utility of polygenic scores for confounder adjustment.

A. A directed acyclic graph (DAG) illustrates the causal structure between polygenic score (PGS), confounder (C), treatment (X) and outcome (Y). The PGS serves as an imperfect proxy variable for the confounder. The effect of the C on the exposure (X) and outcome (Y) are denoted as  $b_{CX}$  and  $b_{CY}$ , respectively. The true unconfounded effect of X on Y is  $b_{XY} = 1$ .

B. Simulation study: Under this model (see **Methods**), we changed the correlation between C and PGS simply by varying  $r$ , and the effect of confounding factor C on X and Y by varying  $b_{CX}$  and  $b_{CY}$ . Under each condition, we measured the observed effect of X on Y, conditioned on PGS and calculated the bias as a percentage of the inflated effect of X on Y.  $\frac{b_{CX}^2}{\text{var}(X)} = \frac{b_{CY}^2}{\text{var}(Y)} = 0.1$  for small confounding effect, 0.2 for small-medium confounding effect, 0.3 for medium-large confounding effect and 0.5 for large confounding effect. These simulations show that even if PGS is strongly correlated with the confounder (i.e.  $r^2 = 0.5$ ) - an unlikely scenario given the correlation between PGS and traits are generally lower - correcting for PGS does not completely account for the bias introduced by the confounder.

227

228 Mendelian Randomization can help identify residual confounders in  
 229 emulated trials

230

231 Mendelian randomization (MR) is a powerful method to investigate causal relationships between  
 232 exposure and outcome variables. By leveraging genetic variants as instrumental variables, MR  
 233 can help infer causality in observational studies.<sup>19,31</sup>

234 While MR is typically used to assess the causal relationships between an exposure and an  
 235 outcome, it can be more generally used as a confounder detector.<sup>32</sup> In this case, genetic variants  
 236 are used as instruments to test the causal relationships between the potential confounder and  
 237 both the exposure and the outcome. Unlike PGS, MR selects for variants that are directly

238 associated with the confounder and use different techniques to limit horizontal pleiotropy (i.e. to  
239 limit the impact of variants that are associated with the outcome not via the exposure)

240 We use an MR framework to better understand whether 19 traits can be considered as  
241 confounders in the Empareg emulated RCT. Following the DAG in Figure 4A we tested whether  
242 the genetic instruments for the potential confounders were associated with both empagliflozin  
243 treatment ( $G \rightarrow X$ ) and coronary heart disease, a proxy for 3P-MACE ( $G \rightarrow Y$ ).

244 Two-sample MR studies revealed putative causal effects of 14 out of 19 potential confounders on  
245 coronary heart disease (**Figure 4B1**). There is extensive orthogonal evidence supporting the  
246 causal nature of these relationships.<sup>33-38</sup> When performing MR of the confounder on empagliflozin  
247 treatment, we observed 15 out of 19 traits to have a statistically significant effect (**Figure 4B2**).  
248 Since confounders are defined as variables with an effect on both, the exposure and outcome,  
249 we were specifically interested in traits where we observed an effect on both coronary heart  
250 disease and an empagliflozin treatment. This was the case for 12 traits when emulating Empareg  
251 with a plain observational approach. For example, BMI was a likely confounder being putatively  
252 causally associated, according to MR, with both empagliflozin treatment (OR= 2.68 [2.51 - 2.87],  
253  $P < 2 \times 10^{-16}$ ) and coronary heart disease (OR = 1.55 [1.48 - 1.64],  $P < 2 \times 10^{-16}$ ). The putative  
254 causal effect on empagliflozin treatment highlights doctors' tendency to prescribe this medication  
255 to patients with higher BMI, a significant risk factor for T2D, which is the primary reason for the  
256 drug's prescription.

257  
258 After including eligibility criteria and a comparator group (**Figure 4B3**), only 2 traits, HbA1c and  
259 CRP remain significantly associated, according to MR, to both empagliflozin treatment and  
260 coronary heart disease.

261  
262 We further examined whether the causal effects of potential confounders on empagliflozin  
263 treatment was mediated by their effect on coronary heart disease. In other words, if the doctor's  
264 choice to prescribe empagliflozin was informed by the potential confounder effect on the  
265 cardiovascular risk of the patient. If that would be the case, the confounder cannot be defined as  
266 such as it is associated with exposure via the outcome ( $C \rightarrow Y \rightarrow X$ ). We show that these effects  
267 are small across all the putative confounders (**Supplementary Figure 7**) and hence the observed  
268  $C \rightarrow Y$  causal effect is direct.

269  
270

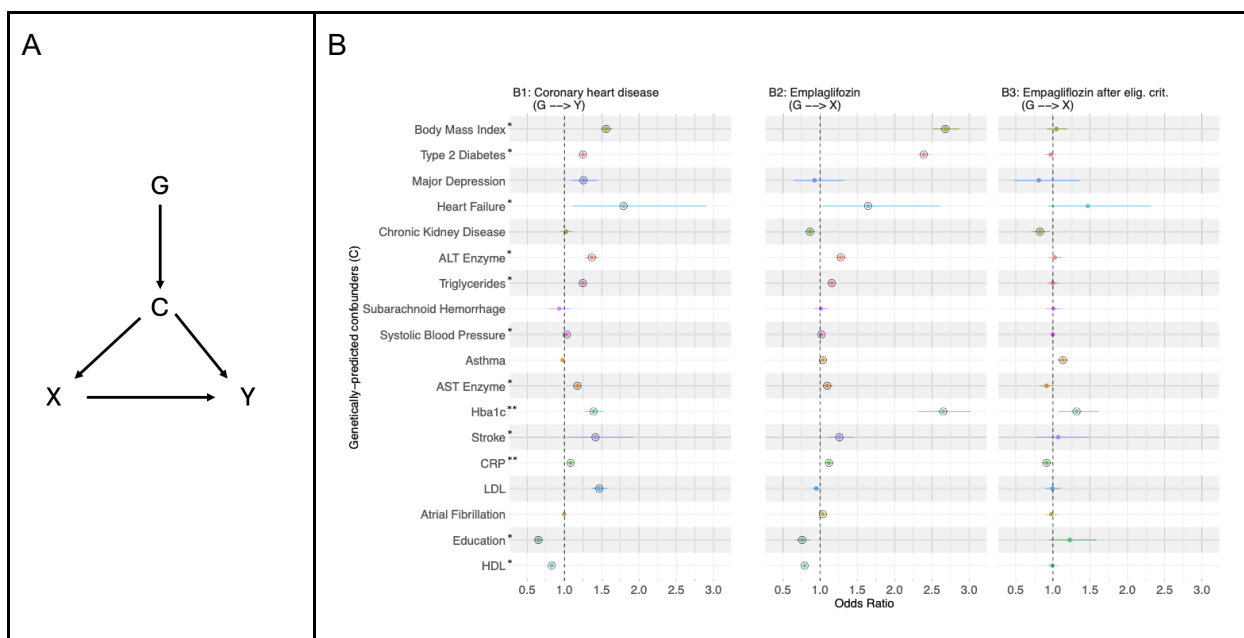

**Figure 4. Using mendelian randomization within Empareg trial emulation to identify confounders.**

A. A direct acyclic graph (DAG) illustrating the relationship between treatment initiation (X) and trial outcome (Y), as well as the effect of a genetic instrument (G) of a confounding variable (C) on both the treatment initiation and trial outcome only through the confounding variable.

B. Results of a mendelian randomization (MR) analysis using inverse variance-weighted to study the causal effects of 18 traits on coronary heart disease, representing the trial outcome, and empagliflozin, representing the treatment initiation. B1. MR for association between 18 traits on coronary artery disease using two-sample MR. B2. MR for association between 18 traits on empagliflozin initiation in the full study population. B3 MR for association between 18 traits on empagliflozin initiation after applying the randomized trial's eligibility criteria.

The point estimates represent the odds ratios with lines representing their 95% confidence interval. For continuous confounders, the odds ratio reflects the change in the outcome variable associated with a 1 SD increase in the exposure variable; for binary confounders, the odds ratio represents the change in the outcome variable when comparing the presence versus the absence of the binary exposure. A circle around the point estimates represents statistical significance with a P value threshold of  $5 \times 10^{-2}$ .

\* putative confounder, due to significance in B1 and B2; \*\* putative confounder, due to significance in B1 and B3; ALT, alanine transaminase; AST, aspartate transaminase; Hba1c, glycated hemoglobin A1c; CRP, C-reactive protein; LDL, low-density lipoprotein; HDL, high-density lipoprotein; elig. crit., eligibility criteria; X, treatment; Y, outcome; C, confounder; G, genetic instrument.

271

272 Emulated trials can be used to better evaluate the prognostic and

273 predictive enrichment of polygenic scores

274 PGS can be used to enrich RCTs by identifying individuals based on higher risk of disease

275 ('prognostic enrichment'), or increased probability of benefit ('predictive enrichment').<sup>13</sup> However,

276 to evaluate these potential benefits, it is necessary to test both prognostic and predictive

277 enrichment hypotheses between a study population that is as close as possible to that of the

278 prospective RCT. In fact, PGS have shown different prediction performances across ages, sex,

279 socio-economic group and co-morbidities.<sup>14,39</sup> Moreover, eligibility criteria can restrict the study  
280 population to high-risk individuals where PGS might have limited effects.<sup>40</sup>

281  
282 We first test prognostic enrichment by evaluating whether the PGS for the outcomes of the 4  
283 emulated trials (i.e. coronary heart disease and stroke) were associated with the trial outcome  
284 within the emulated RCT population (**Figure 5A**). We also compare these effects with those  
285 observed in the general population, to see if the performances of PGSs were different when  
286 restricting to eligible individuals in the RCTs.

287 For both Empareg and Tecos emulation, we found the PGS for coronary heart disease to be  
288 associated with 3P-MACE (HR = 1.18; 95% CI= 1.06-1.32 in Empareg and HR = 1.43; 95% CI=  
289 1.09-1.88 in Tecos). These effects were consistent with what was observed in the full FinnGen  
290 (HR = 1.24; 95% CI= 1.23-1.25).

291 However, for Aristotle and Rocket emulation the PGS for stroke was not associated with the  
292 composite endpoint stroke/systemic embolism (HR = 0.97; 95% CI= 0.79-1.20 for Aristotle and  
293 HR = 0.86; 95% CI= 0.62-1.18 for Rocket) despite the significant PGS association in the full  
294 population of FinnGen (HR = 1.14; 95% CI= 1.13-1.15).

295 These results suggest that care should be taken when generalizing the PGS association from the  
296 general population to RCT participants.

297 Given the significant prognostic enrichment for Empareg and Tecos, we calculated the reduction  
298 in sample size required to achieve a similar number of events, and consequently similar statistical  
299 power, if we had included individuals in the top 25% of the PGS for coronary heart disease. This  
300 prognostic enrichment approach strategy would have resulted in -8.6% and -26% reduction in  
301 sample size, given all the other inclusion and exclusion criteria being the same (**Figure 5B**).

302  
303 Finally, we tested predictive enrichment in Empareg and Tecos by evaluating the interaction  
304 between the PGS for coronary heart disease and the treatment arm indicator. A significant  
305 interaction would indicate the treatment being more effective in individuals with higher or lower  
306 PGS. There was no significant interaction either in the Empareg emulation (P = 0.99) or in the  
307 Tecos emulation (P = 0.24).

308

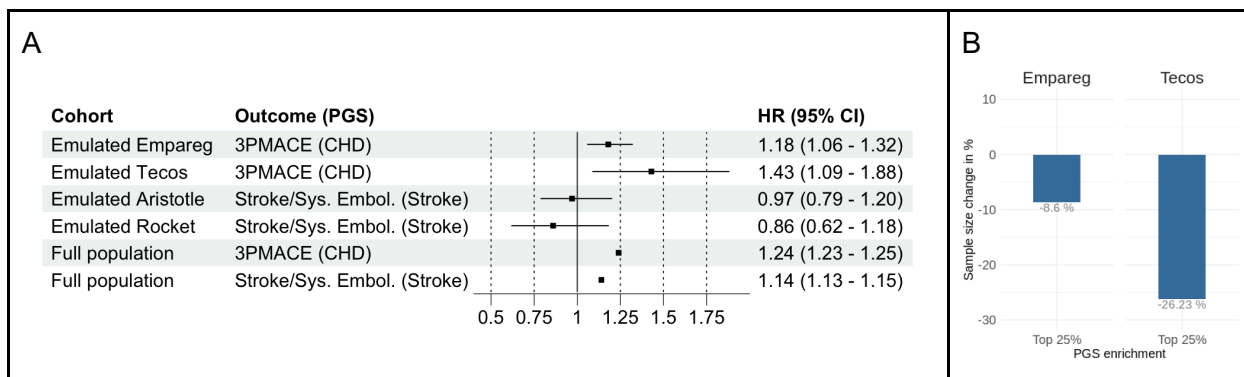

**Figure 5. Effect of the polygenic scores on the primary trial outcomes among individuals included in trial emulations and in the full study population**

A. Effect of the outcome PGS on the primary outcome within each 1:1 nearest neighbor propensity score-matched trial cohort using Cox regression and adjusting for the treatment, as well as within the full FinnGen population. Hazard ratios per one standard deviation increase in genetic liability and their 95% confidence intervals are illustrated in the central forestplot.

B. Sample size reduction of the emulated Empareg and Tecos trials after enriching the trial cohorts with individuals at top 25% genetic risk for CHD (top 25% CHD PGS) Empareg (EMPA-REG OUTCOME), BI 10773 (Empagliflozin) Cardiovascular Outcome Event Trial in Type 2 Diabetes Mellitus Patients; Tecos (TECOS), Sitagliptin Cardiovascular Outcomes Study (MK-0431-082); Aristotle (ARISTOTLE), Apixaban for the Prevention of Stroke in Subjects With Atrial Fibrillation; Rocket (ROCKET-AF), An Efficacy and Safety Study of Rivaroxaban With Warfarin for the Prevention of Stroke and Non-Central Nervous System Systemic Embolism in Patients With Non-Valvular Atrial Fibrillation HR, hazard ratio; CI, confidence interval; PGS, polygenic score, 3PMACE, 3-point major adverse cardiovascular events; CHD, coronary heart disease; Sys. Embol., systemic embolism.

## 310 Discussion

311  
312 In this study we show how genetic data can benefit target trial emulation design and analysis and  
313 how a trial emulation framework can be used to better understand the value of polygenic scores  
314 for RCT design.

315  
316 To answer these questions, we first emulated 4 transformative cardiometabolic RCTs in FinnGen  
317 using the framework used by the RCT-DUPLICATE initiative.<sup>26</sup> We learned that despite the large  
318 sample size and complete national coverage of drug purchases and health outcomes, RCT  
319 emulation requires a very large number of individuals. During the propensity score matching step,  
320 on average, 78% of individuals get discarded, as we aimed to match patients as closely as  
321 possible to ensure comparability between treatment groups, thus reducing the final sample size.  
322 Nonetheless, we were able to successfully emulate all 4 trials and generate real-world evidence  
323 that is concordant with the RCTs results. Emulation of smaller RCTs, as e.g. trials for rare  
324 diseases, is probably not possible at the current sample size of 500,000 genotyped individuals,  
325 highlighting how generation of ever larger genetic datasets is required if one aims to assess the  
326 role of genetics in trial-like populations.

327  
328 Confounding by indication is particularly severe in observational studies of medications. Our  
329 approach leverages the enormous catalog of genotype-phenotype relationships generated by  
330 genome-wide association studies to “impute” biological risk factors that might act as confounders.  
331 We show that polygenic scores can be used to identify both measured and unmeasured factors  
332 that are unbalanced between the two arms of the trials. Some of these factors are likely  
333 confounders, others are not; polygenic scores cannot distinguish between the two. However,  
334 polygenic scores can provide a more refined measure of the disease risk than simple disease  
335 diagnoses. For example, we show that in the emulated EMPAREG trial, which includes only T2D  
336 patients, a polygenic score with T2D was still unbalanced between the two arms of the trial. This  
337 might reflect unaccounted confounding by indication based on patients’ T2D risk of T2D-related  
338 factors. Reassuringly, we saw that in all emulated trials, the polygenic scores imbalance greatly  
339 reduced after propensity score matching. Our work highlights the importance of matching as a  
340 technique for confounding adjustment in observational data and suggest that polygenic scores  
341 can be used as an orthogonal assessment of the quality of matching, especially for biologically  
342 risk factors with genetic bases that are not comprehensively captured by claim or registry data  
343 (e.g. disease-specific biomarkers). It is also worth highlighting that if a polygenic score is balanced

344 between trial arms, this does not imply the predicted trait is also balanced. Polygenic scores are  
345 generally poor predictors of traits, even those with strong genetic bases, and adjusting or  
346 matching for polygenic scores, as shown by our simulations, is unlikely to control for the trait they  
347 are predicting. One should also consider that if the polygenic score for a potential confounder  
348 correlates with the genetics of the drug response, PGS differences between trial arms should be  
349 expected.

350  
351 Genetics-based instrumental variable approaches can however be used, together with specialist  
352 knowledge and other orthogonal evidence, to identify confounders. While others suggested that  
353 Mendelian Randomization can be used for confounder detection<sup>41-43</sup>, we applied and extended  
354 this framework to emulated RCTs. While MR has numerous limitations that have been extensively  
355 described with regard to its most common use to assess the causal relationships between  
356 exposure and outcome<sup>19</sup>, here we mention a few limitations that are unique to its use in  
357 confounder detection. First, the causal relationship between an exposure (or potential  
358 confounder) and a treatment should be interpreted with caution. A putative causal effect is likely  
359 to indicate that the exposure is influencing the doctor's decision to prescribe the treatment and  
360 not the treatment effectiveness itself. For example, we identify a negative putative causal effect  
361 of chronic kidney disease (CKD) on empagliflozin treatment, reflecting the former doctor's  
362 decision to avoid prescribing empagliflozin to patients with severely impaired renal function before  
363 more recent evidence emerged showing its benefits for these patients.<sup>44-47</sup> Second, the effect of  
364 the confounder on the treatment can be mediated by the outcome or the effect on the outcome  
365 can be mediated by the treatment. These effects can be addressed by closer examining the true  
366 causal structure and adjusting the confounder effects by the effects of all other pathways,  
367 excluding the direct effect of confounder on treatment or outcome, respectively.  
368 Despite these interpretational challenges, MR can be a powerful tool for confounder detection  
369 during RCT emulation. At the "eligibility criteria" stage MR could inform about residual  
370 confounding and suggest which factors, if measured, to include in propensity score-matching.  
371 After matching, MR can still be used to investigate non-adjusted residual confounding and,  
372 together with expert knowledge, better interpret the results of the emulated RCTs.  
373 While we only discussed MR for confounding detection, it would be theoretically possible to use  
374 MR for confounding adjustment.

375

376



377 The trial emulation framework is useful to better understand the value of genetics in trial design.  
378 The most promising use of trial emulation is to assess the prognostic enrichment for polygenic  
379 scores. Individuals enrolled in RCTs are highly selected and do not represent the general  
380 population. It would be naïve to assume the magnitude of association of a polygenic score with a  
381 certain outcome in the general population would be the same among RCT trial participants. A trial  
382 emulation framework can be used to draw a boundary on the expected association between the  
383 polygenic score and the trial outcome, a key piece of information when designing a RCT that uses  
384 genetics for either patient selection or as stratification criteria.

385 A trial emulation is less valuable to understand predictive enrichment because, at current sample  
386 size, biobank-based emulated RCTs still have limited power to test for interaction between  
387 polygenic scores and treatment or to stratify individuals in different genetic risk bins.

388  
389 In conclusion, our work shows that genetic information can improve the design of emulated trials,  
390 which, in turn, can help inform the use of genetics in designing RCTs. Some of these results can  
391 be extended to other -omics that are getting measured in hundreds of thousands of biobanked  
392 samples.

393

## 394 Methods

### 395 Study population

396 In the current study, we included samples from 425 483 individuals from Finland, sourced from  
397 FinnGen Data Freeze 10 (<https://www.finngen.fi/en>).<sup>21</sup> This biobank study includes samples from  
398 hospital biobanks, alongside prospective epidemiological and disease-based cohorts. Utilizing the  
399 unique national personal identification numbers, the data were interconnected with national  
400 registries including hospital discharge records (accessible from 1968), death records (from 1969),  
401 cancer registries (from 1953), and drug purchase records (from 1995). Registry information was  
402 accessible up to December 31, 2021.

403

### 404 Trial Selection

405 As the currently largest trial emulation effort, the RCT Duplicate project<sup>6,26</sup> has been emulating  
406 numerous RCTs in US-American insurance claims datasets, the goal of which was to assess the  
407 utility of the obtained Real-World Evidence (RWE) for regulatory-decision making.

408 We sought to identify four RCTs that have been previously replicated by RCT Duplicate and were  
409 feasible to be successfully emulated in our Real-World Data (RWD) dataset. By the time of  
410 initiation of our project, findings of the first 10 trial emulations were published by the RCT Duplicate  
411 project.<sup>26</sup> The evaluation criteria deciding upon the feasibility of a RCT replication included critical  
412 aspects of the trial emulation protocol, such as the primary outcomes, eligibility criteria, treatment  
413 strategies, allowing for only minor deviations if features were not available in our data source  
414 (**Supplementary Tables 2-3**). The RCT was seen as closely emulated when the emulation of  
415 comparator and outcome were at least moderate, and at least one of them was good, as described  
416 in the meta-analysis of RCT Duplicate data.<sup>48</sup>

417

### 418 Trial Emulation Design and Analysis

419 Based on RCT Duplicate's trial emulation efforts, we developed the protocols for the emulations  
420 of four trials (Empareg, Tecos, Aristotle and Rocket). Closely following the original trial protocols  
421 we emulated an observational data protocol for each trial, including the eligibility criteria, treatment  
422 strategies, assignment procedures, follow-up periods, primary outcomes, causal contrasts and an  
423 analysis plan.<sup>4</sup>

424  
425 Different sets of eligibility criteria required fulfillment within distinct timeframes prior to therapy  
426 initiation. Flowcharts of cohort formations can be found in **Supplementary Tables 4-7** and  
427 **Supplementary Figures 8-11**.

428  
429 The treatment strategies included new users of either the drug of interest or the comparator drug,  
430 starting from the date the newer drug received marketing authorization in Finland. For the two  
431 placebo-controlled trials, Empareg and Tecos, we selected an active comparator as a proxy for  
432 placebo regarding cardiovascular effects, similar to RCT Duplicate. This is due to the fact that  
433 confounding bias may become especially serious when active user groups are compared to  
434 nonuser groups, as nonuser comparator groups considerably differ from actively treated patients  
435 in ways that are poorly captured in observational datasets.<sup>49,50</sup>

436  
437 As a proxy for placebo DPP4-inhibitors for Empareg and second-generation sulfonylureas for  
438 Tecos were chosen, given they likewise antidiabetic treatments, commonly prescribed  
439 interchangeably to the treatments of interest and are known not have any causal effect on  
440 cardiovascular outcomes based on current evidence.<sup>23,51-53</sup>

441  
442 As the assignment procedures in observational studies are never at random, an adjustment for  
443 confounding variables is required in order to satisfy the exchangeability assumption. We selected  
444 sets of >25 confounding variables, measured within 6 months prior to drug initiation, reflecting  
445 demographics, comorbidities, comedications and cardiovascular procedures. We adopted 1:1  
446 propensity score (PS) nearest-neighbor matching with a caliper of 0.1 or 0.01 on the PS scale,  
447 depending on the initial overlap.<sup>54,55</sup> PS matching statistics and details on covariate balance for  
448 all trial emulations can be found in **Supplementary Tables 8-11**.

449  
450 Follow-up started at the first purchase of either of the defined therapeutics and ended with the  
451 occurrence of a primary outcome event, death, discontinuation or switch to a comparator or end  
452 of registry information, whichever occurs first. The time point of a discontinuation of therapy was  
453 calculated based on the number of packages purchased by the patient multiplied by the package  
454 size.

455

456 The primary outcome for Empareg and Tecos was 3P-MACE and for Aristotle and Rocket a  
457 composite endpoint of stroke and systemic embolism, adapted from the definition used in the  
458 corresponding trials.

459  
460 In our analysis we employed an “on-treatment” approach attempting to replicate an intention-to-  
461 treat estimate derived from the RCT with particularly high treatment compliance. Hazard ratios  
462 (HR) and 95% confidence intervals (95% CI) were estimated in PS-matched cohorts using the  
463 Cox proportional hazard models. We defined “estimate agreement” as the emulation estimate  
464 being within the 95% CI for the RCT estimate.

465

## 466 PGS Generation

467 We computed genome-wide polygenic scores (PGS) for 20 traits (**Supplementary Table 12**)  
468 using the PGS-continuous shrinkage priors (CS) method.<sup>56</sup> The input weights were derived from  
469 available summary statistics sourced from external GWAS data pertaining to the 20 traits.  
470 Variants were restricted to those present in the HapMap 3 reference panel.<sup>57</sup> To ensure  
471 comparability, PGS were standardized (mean = 0; standard deviation = 1) in the whole FinnGen  
472 population. Detailed information regarding the summary statistics can be found in the  
473 supplementary material.

474

## 475 PGS Analysis of Cohorts

476 We investigated genetic differences between the treated and control groups at three different  
477 stages of the emulation process and how they change with increased confounder adjustment.  
478 For each PGS we calculated the difference in means (standardized mean difference, SMD)  
479 between the treated and control groups using logistic regression and determined its significance  
480 on the basis of a Bonferroni-corrected P value threshold ( $2.5 \times 10^{-3}$ ).

481

482 In the first stage, we looked at a plain observational setting that is best reflecting the original RCT  
483 question. Therefore, as Empareg and Tecos are both placebo-controlled trials, we defined the  
484 plain observational setting as initiators of the treatment vs non-initiators. Since Aristotle and  
485 Rocket are both active-comparator trials, the plain observational setting was defined as initiators  
486 of the treatment vs initiators of the active comparator. In the second stage, we looked at the

487 cohorts after applying the eligibility criteria. And in the third, we considered the PS-matched  
488 cohorts.

489

## 490 Simulations

491 To show that correcting on an imperfect proxy of the confounder can result in bias in effect size  
492 estimates, we carried out simulation experiments under the causal model shown in **Figure 3A**.

493 We first generated PGS as a random variable following the standard normal distribution  $N(0,1)$ ,  
494 and the rest of the variables were subsequently created as

495

$$496 \quad C = rPGS + \sqrt{(1-r^2)} \varepsilon_C,$$

$$497 \quad X = b_{CX}C + \sqrt{(1-b_{CX}^2)} \varepsilon_X,$$

498 and  $Y = X + b_{CY}C$ , where  $\varepsilon_C, \varepsilon_X \sim N(0,1)$ .

499

500 The variables were simulated as such so that the variance of PGS, C and X were all 1, and the  
501 expected effect of X on Y is 1. Under this model, we could change the correlation between C and  
502 PGS simply by varying r, and the effect of confounding factor C on X and Y by varying  $b_{CX}$  and  
503  $b_{CY}$ . Under each condition, we measured the observed effect of X on Y, conditioned on PGS,  
504 which was an imperfect proxy of C, through linear regression  $lm(Y \sim X + PGS)$ . We denoted  
505 estimate bias as the observed regression coefficient – 1, which is the expected underlying effect  
506 of X on Y.

507

508 We wanted to also demonstrate that even under a fixed correlation coefficient between C and  
509 PGS, extent of bias in observed X on Y effect can still vary due to additional components  
510 contributing to only PGS and X, Y but not C, we further carried out simulations under a different  
511 causal model showed in **Supplementary Figure 6A**, where PGS and confounder C are correlated  
512 due to a common underlying causal factor  $G^*$ . Meanwhile, an extra component  $G'$  contribute only  
513 to PGS but not C. Under this model, we first generated shared causal factor  $G^*$  and PGS unique  
514 causal factor  $G'$  independently following the standard normal distribution  $N(0,1)$ , and other  
515 variables as below:

516

$$PGS = b_{G^*PGS}G^* + \sqrt{(1-b_{G^*PGS}^2)} G'$$

517  $C = b_{G^*C}G^* + \sqrt{(1 - b_{G^*C}^2)} \varepsilon_C$ , where  $b_{G^*C} = \frac{r}{b_{G^*PGS}}$  and  $r$  is the correlation coefficient between

518  $C$  and  $PGS$ . We fixed the contribution of  $G^*$  on  $PGS$  as  $\frac{b_{G^*PGS}^2}{Var(PGS)} = 0.8$  and  $r^2 = 0.3$  in this experiment.

519

520 Subsequently, we simulated  $X$  and  $Y$  as

521  $X = b_{G'X}G' + b_{CX}C + \sqrt{(1 - b_{G'X}^2 - b_{CX}^2)} \varepsilon_C$  and  $Y = X + b_{G'Y}G' + b_{CY}C$

522 The variables were simulated as such so that variance of  $G'$ ,  $G^*$ ,  $PGS$ ,  $C$  and  $X$  were all 1, and

523 the expected effect of  $X$  on  $Y$  is 1. In this experiment, for simplicity, we fixed the contribution of  $C$

524 on  $X$  and  $Y$  so that  $\frac{Var(b_{CX}C)}{Var(X)} = \frac{Var(b_{CY}C)}{Var(Y)} = 0.3$ , and assumed that  $G'$  has no effect on  $Y$ .

525 Furthermore, as a proof of concept, we assumed that  $G'$  has a negative effect on  $X$  ( $b_{G'X}^2 < 0$ )

526 since in this case, we expect to see an increment in estimate bias when  $G'$  contributes more to

527 the variance of  $X$ . We looked at estimate bias from a same linear regression

528  $lm(Y \sim X + PGS)$  in respect of changes in  $\frac{(1 - b_{G^*PGS}^2)}{Var(PGS)}$  and  $\frac{b_{G'X}^2}{Var(X)}$ .

529

## 530 Genome-wide association studies

531 We used REGENIE<sup>58</sup> to perform a GWAS of empagliflozin initiation in the whole population,

532 including 426,775 samples (cases: 14,996; controls: 411,779) as well as after applying the

533 eligibility criteria of the Empareg emulation, including 11,349 samples (cases: 4,630; controls:

534 6,719). Details on genotyping and imputation in FinnGen can be found in Kurki et al. 2023.

535

## 536 Mendelian Randomization Analysis

537 By utilizing genetic variants as instrumental variables, we employed two-sample Mendelian

538 randomization (MR) to investigate the confounding status of numerous variables in a trial

539 emulation setting.<sup>18</sup> In our MR analysis we only focused on the Empareg trial emulation. We

540 examined the effect of the 20 traits used in the PGS analysis (sources of external summary

541 statistics can be found in **Supplementary Table 12**) on the trial outcome, represented by

542 summary statistics for CHD, as well as on receiving the empagliflozin treatment in the whole

543 population and after applying the eligibility criteria, both represented by summary statistics from

544 our GWASs. We performed the MR analysis using the inverse variance-weighted method (IVW).

545 To obtain the independent instrumental variants (IVs) for each trait we filtered for significant  
546 exposure-associated SNPs ( $P \text{ Value} < 5 \times 10^{-8}$ ), performed linkage disequilibrium (LD) clumping  
547 ( $r^2 < 0.001$ ; clumping window = 10,000 kb) and excluded potential outcome-associated SNPs  
548 (defined as  $P \text{ Value} < 5 \times 10^{-8}$  with the outcome).

549  
550 We identified three key steps in using MR to explore confounding: (1) MR of potential confounder  
551 on treatment. Conducting an MR analysis to assess the causal effect of the proposed confounding  
552 trait on the treatment variable. If the MR analysis shows a significant association, it suggests the  
553 potential confounder is indeed related to the treatment. (2) MR of potential confounder on  
554 outcome. Performing a separate MR analysis to evaluate the causal effect of the proposed  
555 confounding trait on the trial outcome variable. If the MR analysis demonstrates a significant  
556 association, it indicates the potential confounder is also related to the outcome. (3) Interpretation.  
557 If both MR analyses (steps 1 and 2) show significant associations, it implies the proposed trait is  
558 very likely to be a true confounder that needs to be accounted for and addressed through  
559 statistical adjustment in the trial emulation to obtain widely unbiased average treatment effects.  
560 Expert knowledge is still required to assess the plausibility of the MR analyses.

561

## 562 Statistical Analysis of the Outcome PGS within Trial Emulations

563 Analogously to the MR analysis, we selected the CHD PGS as outcome PGS for MACE and  
564 Stroke PGS for the composite endpoint stroke/systemic embolism. We evaluated the effect of the  
565 outcome PGS on the primary outcome within each PS-matched cohort using Cox regression and  
566 adjusting for the treatment.

567

$$568 \quad h(t | T, PGS) = h_0(t) + \exp^{\beta_1 * T + \beta_2 * PGS}$$

569

570  $h(t)$  : hazard at time  $t$

571  $h_0(t)$  : baseline hazard at time  $t$

572  $T$  : treatment group

573  $PGS$  : outcome PGS

574  $\beta_1$  and  $\beta_2$  : coefficients associated with the treatment group variable  $T$  and  $PGS$  respectively

575

576 Additionally, we predicted the outcome PGS effects on the primary outcome in the full population,  
577 using Cox regression. Survival times started at birth with follow-up until the occurrence of the  
578 primary outcome, death or end of registry information, whichever occurred first.  
579 Furthermore, we determined the event rate of the primary outcome for each trial and investigated  
580 the event rates within individuals with top 25% PGS. Based on that we calculated the required  
581 sample sizes given the new event rates, to reach the same statistical power. This was in order to  
582 assess the effect of PGS enrichment on sample sizes in clinical trials.  
583



## 584 Code Availability

585 The study utilized previously published analysis tools as described in the **Methods** section.

586 Additional code used for these analyses is available at

587 [https://github.com/dsgelab/trial\\_emulations\\_genetics](https://github.com/dsgelab/trial_emulations_genetics)

588

## 589 Data Availability

590 Access to individual-level sensitive health data, as mandated by National and European

591 regulations (GDPR), requires approval from national authorities for specific research projects and

592 for researchers who are explicitly listed and approved. The health data referenced in this study

593 was generated and provided by the National Health Register Authorities (Finnish Institute of

594 Health and Welfare, Statistics Finland, KELA, Digital and Population Data Services Agency) and

595 approved by either the respective authorities or the Finnish Data Authority, Findata, for use in the

596 FinnGen project. As a result, we, the authors, are unable to grant access to individual-level data

597 to third parties. However, researchers can apply for access to the health register data through the

598 Finnish Data Authority, Findata (<https://findata.fi/en/permits/>), and for individual-level genotype

599 data from Finnish biobanks through the Fingenious portal (<https://site.fingenious.fi/en/>), managed

600 by the Finnish Biobank Cooperative FINBB (<https://finbb.fi/en/>). All Finnish biobanks can provide

601 data for research projects under the scope of the Finnish Biobank Act, which includes research

602 aimed at promoting health, understanding disease mechanisms, or developing health and medical

603 care products and practices. More information on accessing FinnGen data can be found here:

604 [https://www.finnngen.fi/en/access\\_results](https://www.finnngen.fi/en/access_results). A comprehensive list of FinnGen endpoints is available

605 at: <https://www.finnngen.fi/en/researchers/clinical-endpoints>.

606

## 607 Ethics statement and materials & methods

608

609 Patients and control subjects in FinnGen provided informed consent for biobank research, based

610 on the Finnish Biobank Act. Alternatively, separate research cohorts, collected prior the Finnish

611 Biobank Act came into effect (in September 2013) and start of FinnGen (August 2017), were

612 collected based on study-specific consents and later transferred to the Finnish biobanks after

613 approval by Fimea (Finnish Medicines Agency), the National Supervisory Authority for Welfare

614 and Health. Recruitment protocols followed the biobank protocols approved by Fimea. The

615 Coordinating Ethics Committee of the Hospital District of Helsinki and Uusimaa (HUS) statement  
616 number for the FinnGen study is Nr HUS/990/2017.

617  
618 The FinnGen study is approved by Finnish Institute for Health and Welfare (permit numbers:  
619 THL/2031/6.02.00/2017, THL/1101/5.05.00/2017, THL/341/6.02.00/2018,  
620 THL/2222/6.02.00/2018, THL/283/6.02.00/2019, THL/1721/5.05.00/2019 and  
621 THL/1524/5.05.00/2020), Digital and population data service agency (permit numbers:  
622 VRK43431/2017-3, VRK/6909/2018-3, VRK/4415/2019-3), the Social Insurance Institution  
623 (permit numbers: KELA 58/522/2017, KELA 131/522/2018, KELA 70/522/2019, KELA  
624 98/522/2019, KELA 134/522/2019, KELA 138/522/2019, KELA 2/522/2020, KELA 16/522/2020),  
625 Findata permit numbers THL/2364/14.02/2020, THL/4055/14.06.00/2020,  
626 THL/3433/14.06.00/2020, THL/4432/14.06/2020, THL/5189/14.06/2020,  
627 THL/5894/14.06.00/2020, THL/6619/14.06.00/2020, THL/209/14.06.00/2021,  
628 THL/688/14.06.00/2021, THL/1284/14.06.00/2021, THL/1965/14.06.00/2021,  
629 THL/5546/14.02.00/2020, THL/2658/14.06.00/2021, THL/4235/14.06.00/2021, Statistics Finland  
630 (permit numbers: TK-53-1041-17 and TK/143/07.03.00/2020 (earlier TK-53-90-20)  
631 TK/1735/07.03.00/2021, TK/3112/07.03.00/2021) and Finnish Registry for Kidney Diseases  
632 permission/extract from the meeting minutes on 4th July 2019.

633  
634 The Biobank Access Decisions for FinnGen samples and data utilized in FinnGen Data Freeze  
635 10 include: THL Biobank BB2017\_55, BB2017\_111, BB2018\_19, BB\_2018\_34, BB\_2018\_67,  
636 BB2018\_71, BB2019\_7, BB2019\_8, BB2019\_26, BB2020\_1, BB2021\_65, Finnish Red Cross  
637 Blood Service Biobank 7.12.2017, Helsinki Biobank HUS/359/2017, HUS/248/2020,  
638 HUS/150/2022 § 12, §13, §14, §15, §16, §17, §18, and §23, Auria Biobank AB17-5154 and  
639 amendment #1 (August 17 2020) and amendments BB\_2021-0140, BB\_2021-0156 (August 26  
640 2021, Feb 2 2022), BB\_2021-0169, BB\_2021-0179, BB\_2021-0161, AB20-5926 and amendment  
641 #1 (April 23 2020)and it's modification (Sep 22 2021), Biobank Borealis of Northern  
642 Finland\_2017\_1013, 2021\_5010, 2021\_5018, 2021\_5015, 2021\_5023, 2021\_5017, 2022\_6001,  
643 Biobank of Eastern Finland 1186/2018 and amendment 22 § /2020, 53§/2021, 13§/2022,  
644 14§/2022, 15§/2022, Finnish Clinical Biobank Tampere MH0004 and amendments (21.02.2020  
645 & 06.10.2020), §8/2021, §9/2022, §10/2022, §12/2022, §20/2022, §21/2022, §22/2022,  
646 §23/2022, Central Finland Biobank 1-2017, and Terveystalo Biobank STB 2018001 and  
647 amendment 25th Aug 2020, Finnish Hematological Registry and Clinical Biobank decision 18th  
648 June 2021, Arctic biobank P0844: ARC\_2021\_1001.

649

## 650 Acknowledgements

651 This work was supported by funding from the Eric and Wendy Schmidt Center at the Broad  
652 Institute of MIT and Harvard.

653 The FinnGen project receives funding from two Business Finland grants (HUS 4685/31/2016 and  
654 UH 4386/31/2016) and the following industry partners: AbbVie Inc., AstraZeneca UK Ltd., Biogen  
655 MA Inc., Bristol Myers Squibb (and Celgene Corporation & Celgene International II), Genentech  
656 Inc., Merck Sharp & Dohme LLC, Pfizer Inc., GlaxoSmithKline Intellectual Property Development,  
657 Sanofi US Services, Maze Therapeutics Inc., Janssen Biotech Inc., Novartis AG, and Boehringer  
658 Ingelheim International GmbH. We acknowledge the contributions of the following biobanks for  
659 providing samples to FinnGen: Auria Biobank (<https://www.auria.fi/biopankki/>), THL Biobank  
660 (<https://www.thl.fi/biobank/>), Helsinki Biobank (<https://www.helsinginbiopankki.fi/>), Biobank  
661 Borealis of Northern Finland ([https://www.ppsHP.fi/Tutkimus-ja-opetus/Biopankki/Pages/Biopankki-  
662 Borealis-briefly-in-English.aspx](https://www.ppsHP.fi/Tutkimus-ja-opetus/Biopankki/Pages/Biopankki-Borealis-briefly-in-English.aspx)), Finnish Clinical Biobank Tampere ([https://www.tays.fi/en-  
663 US/Research\\_and\\_development/Finnish\\_Clinical\\_Biobank\\_Tampere](https://www.tays.fi/en-US/Research_and_development/Finnish_Clinical_Biobank_Tampere)), Biobank of Eastern  
664 Finland (<https://www.ita-suomenbiopankki.fi/en/>), Central Finland Biobank ([https://www.ksshP.fi/fi-  
665 FI/Potilaalle/Biopankki](https://www.ksshP.fi/fi-FI/Potilaalle/Biopankki)), Finnish Red Cross Blood Service Biobank  
666 ([www.veripalvelu.fi/verenluovutus/biopankkitoiminta](http://www.veripalvelu.fi/verenluovutus/biopankkitoiminta)) and Terveystalo Biobank  
667 (<https://www.terveystalo.com/fi/Yritystietoa/Terveystalo-Biopankki/Biopankki/>). All Finnish  
668 biobanks are members of the BBMRI.fi infrastructure (<https://www.bbMRI.fi/>). The FINBB  
669 (<https://finbb.fi/>) is the coordinator of BBMRI-ERIC operations in Finland. Access to Finnish  
670 biobank data is facilitated through the Fingenious services (<https://site.fingenious.fi/en/>) operated  
671 by FINBB.

## 672       References

- 673    1.   Feinstein Alvan R. & Horwitz Ralph I. Double Standards, Scientific Methods, and  
674       Epidemiologic Research. *N. Engl. J. Med.* **307**, 1611–1617 (1982).
- 675    2.   Bakker, E. *et al.* Contribution of Real-World Evidence in European Medicines Agency's  
676       Regulatory Decision Making. *Clin. Pharmacol. Ther.* **113**, 135–151 (2023).
- 677    3.   Office of the Commissioner. Real-World Evidence. *U.S. Food and Drug Administration*  
678       [https://www.fda.gov/science-research/science-and-research-special-topics/real-world-](https://www.fda.gov/science-research/science-and-research-special-topics/real-world-evidence)  
679       evidence (2023).
- 680    4.   Hernán, M. A. & Robins, J. M. Using Big Data to Emulate a Target Trial When a  
681       Randomized Trial Is Not Available. *Am. J. Epidemiol.* **183**, 758–764 (2016).
- 682    5.   Didelez, V., Haug, U. & Garcia-Albeniz, X. Re: Are Target Trial Emulations the Gold  
683       Standard for Observational Studies? *Epidemiology* **35**, e3 (2024).
- 684    6.   Wang, S. V. *et al.* Emulation of Randomized Clinical Trials With Nonrandomized Database  
685       Analyses: Results of 32 Clinical Trials. *JAMA* **329**, 1376–1385 (2023).
- 686    7.   Bigirimurame, T. *et al.* Current practices in studies applying the target trial emulation  
687       framework: a protocol for a systematic review. *BMJ Open* **13**, e070963 (2023).
- 688    8.   Cole, S. R. & Frangakis, C. E. The consistency statement in causal inference: a definition  
689       or an assumption? *Epidemiology* **20**, 3–5 (2009).
- 690    9.   Holland, P. W. Statistics and Causal Inference. *J. Am. Stat. Assoc.* **81**, 945–960 (1986).
- 691    10.   Fewell, Z., Davey Smith, G. & Sterne, J. A. C. The impact of residual and unmeasured  
692       confounding in epidemiologic studies: a simulation study. *Am. J. Epidemiol.* **166**, 646–655  
693       (2007).
- 694    11.   Scola, G. *et al.* Implementation of the trial emulation approach in medical research: a  
695       scoping review. *BMC Med. Res. Methodol.* **23**, 186 (2023).
- 696    12.   Hansford, H. J. *et al.* Reporting of Observational Studies Explicitly Aiming to Emulate

- 697 Randomized Trials: A Systematic Review. *JAMA Netw Open* **6**, e2336023 (2023).
- 698 13. Fahed, A. C., Philippakis, A. A. & Khera, A. V. The potential of polygenic scores to improve  
699 cost and efficiency of clinical trials. *Nat. Commun.* **13**, 2922 (2022).
- 700 14. Jermy, B. *et al.* A unified framework for estimating country-specific cumulative incidence for  
701 18 diseases stratified by polygenic risk. *Nat. Commun.* **15**, 5007 (2024).
- 702 15. Nørgaard, M., Ehrenstein, V. & Vandenbroucke, J. P. Confounding in observational studies  
703 based on large health care databases: problems and potential solutions - a primer for the  
704 clinician. *Clin. Epidemiol.* **9**, 185–193 (2017).
- 705 16. Kuroki, M. & Pearl, J. Measurement bias and effect restoration in causal inference.  
706 *Biometrika* **101**, 423–437 (2014).
- 707 17. Miao, W., Geng, Z. & Tchetgen Tchetgen, E. Identifying Causal Effects With Proxy  
708 Variables of an Unmeasured Confounder. *Biometrika* **105**, 987–993 (2018).
- 709 18. Hartwig, F. P., Davies, N. M., Hemani, G. & Davey Smith, G. Two-sample Mendelian  
710 randomization: avoiding the downsides of a powerful, widely applicable but potentially  
711 fallible technique. *Int. J. Epidemiol.* **45**, 1717–1726 (2016).
- 712 19. Sanderson, E. *et al.* Mendelian randomization. *Nat Rev Methods Primers* **2**, (2022).
- 713 20. Flanders, W. D. *et al.* A method for detection of residual confounding in time-series and  
714 other observational studies. *Epidemiology* **22**, 59–67 (2011).
- 715 21. Kurki, M. I. *et al.* FinnGen provides genetic insights from a well-phenotyped isolated  
716 population. *Nature* **613**, 508–518 (2023).
- 717 22. Zinman, B. *et al.* Empagliflozin, Cardiovascular Outcomes, and Mortality in Type 2  
718 Diabetes. *N. Engl. J. Med.* **373**, 2117–2128 (2015).
- 719 23. Green, J. B. *et al.* Effect of sitagliptin on cardiovascular outcomes in type 2 diabetes. *N.*  
720 *Engl. J. Med.* **373**, 232–242 (2015).
- 721 24. Granger Christopher B. *et al.* Apixaban versus Warfarin in Patients with Atrial Fibrillation. *N.*  
722 *Engl. J. Med.* **365**, 981–992.

- 723 25. Patel Manesh R. *et al.* Rivaroxaban versus Warfarin in Nonvalvular Atrial Fibrillation. *N.*  
724 *Engl. J. Med.* **365**, 883–891.
- 725 26. Franklin, J. M. *et al.* Emulating Randomized Clinical Trials With Nonrandomized Real-World  
726 Evidence Studies: First Results From the RCT DUPLICATE Initiative. *Circulation* **143**,  
727 1002–1013 (2021).
- 728 27. Hernán, M. A., Wang, W. & Leaf, D. E. Target Trial Emulation: A Framework for Causal  
729 Inference From Observational Data. *JAMA* **328**, 2446–2447 (2022).
- 730 28. Moodie, E. E. M. & Stephens, D. A. Using Directed Acyclic Graphs to detect limitations of  
731 traditional regression in longitudinal studies. *Int. J. Public Health* **55**, 701–703 (2010).
- 732 29. Ding, Y. *et al.* Large uncertainty in individual polygenic risk score estimation impacts PRS-  
733 based risk stratification. *Nat. Genet.* **54**, 30–39 (2022).
- 734 30. Ding, Y. *et al.* Polygenic scoring accuracy varies across the genetic ancestry continuum.  
735 *Nature* **618**, 774–781 (2023).
- 736 31. Davies, N. M., Holmes, M. V. & Davey Smith, G. Reading Mendelian randomisation studies:  
737 a guide, glossary, and checklist for clinicians. *BMJ* **362**, k601 (2018).
- 738 32. Sadler, M. C. *et al.* Leveraging large-scale biobank EHRs to enhance pharmacogenetics of  
739 cardiometabolic disease medications. *medRxiv* (2024) doi:10.1101/2024.04.06.24305415.
- 740 33. Held, C. *et al.* Body Mass Index and Association With Cardiovascular Outcomes in Patients  
741 With Stable Coronary Heart Disease - A STABILITY Substudy. *J. Am. Heart Assoc.* **11**,  
742 e023667 (2022).
- 743 34. Sundquist, K. *et al.* Elucidating causal effects of type 2 diabetes on ischemic heart disease  
744 from observational data on middle-aged Swedish women: a triangular analytical approach.  
745 *Sci. Rep.* **11**, 12579 (2021).
- 746 35. de Geus, E. J. C. Mendelian Randomization Supports a Causal Effect of Depression on  
747 Cardiovascular Disease as the Main Source of Their Comorbidity. *J. Am. Heart Assoc.* **10**,  
748 e019861 (2021).

- 749 36. Choi, K. M. *et al.* Implication of liver enzymes on incident cardiovascular diseases and  
750 mortality: A nationwide population-based cohort study. *Sci. Rep.* **8**, 3764 (2018).
- 751 37. Jiao, X., Zhang, Q., Peng, P. & Shen, Y. HbA1c is a predictive factor of severe coronary  
752 stenosis and major adverse cardiovascular events in patients with both type 2 diabetes and  
753 coronary heart disease. *Diabetol. Metab. Syndr.* **15**, 50 (2023).
- 754 38. Tillmann, T. *et al.* Education and coronary heart disease: mendelian randomisation study.  
755 *BMJ* **358**, j3542 (2017).
- 756 39. Mostafavi, H. *et al.* Variable prediction accuracy of polygenic scores within an ancestry  
757 group. *Elife* **9**, (2020).
- 758 40. Lee, J. *et al.* Clinical Conditions and Their Impact on Utility of Genetic Scores for Prediction  
759 of Acute Coronary Syndrome. *Circ Genom Precis Med* **14**, e003283 (2021).
- 760 41. Zhao, S. S. & Burgess, S. Use of Mendelian randomization to assess the causal status of  
761 modifiable exposures for rheumatic diseases. *Best Pract. Res. Clin. Rheumatol.* 101967  
762 (2024).
- 763 42. Darrous, L., Hemani, G., Davey Smith, G. & Kutalik, Z. PheWAS-based clustering of  
764 Mendelian Randomisation instruments reveals distinct mechanism-specific causal effects  
765 between obesity and educational attainment. *Nat. Commun.* **15**, 1420 (2024).
- 766 43. Warwick, A. N. *et al.* Harnessing confounding and genetic pleiotropy to identify causes of  
767 disease through proteomics and Mendelian randomisation – ‘MR Fish’. *bioRxiv* (2024)  
768 doi:10.1101/2024.07.11.24310200.
- 769 44. Overview | Empagliflozin for treating chronic kidney disease | Guidance | NICE.
- 770 45. The EMPA-KIDNEY Collaborative Group. Empagliflozin in Patients with Chronic Kidney  
771 Disease. *N Engl J Med* **388**, 117–127 (2023).
- 772 46. Wanner, C. *et al.* Empagliflozin and progression of kidney disease in type 2 diabetes. *N.*  
773 *Engl. J. Med.* **375**, 323–334 (2016).
- 774 47. Summary of the risk management plan (RMP) for Jardiance (empagliflozin). Preprint at

- 775 [https://fimea.fi/documents/147152901/159459773/27456\\_Jardiance\\_RMP\\_summary-](https://fimea.fi/documents/147152901/159459773/27456_Jardiance_RMP_summary-)  
776 [EN.pdf/a61cbbc0-5351-44b1-b590-247277e56438/27456\\_Jardiance\\_RMP\\_summary-](https://fimea.fi/documents/147152901/159459773/27456_Jardiance_RMP_summary-)  
777 [EN.pdf?t=1689835045091](https://fimea.fi/documents/147152901/159459773/27456_Jardiance_RMP_summary-).
- 778 48. Heyard, R., Held, L., Schneeweiss, S. & Wang, S. V. Design differences and variation in  
779 results between randomised trials and non-randomised emulations: meta-analysis of RCT-  
780 DUPLICATE data. *BMJ Med* **3**, e000709 (2024).
- 781 49. Glynn, R. J., Knight, E. L., Levin, R. & Avorn, J. Paradoxical relations of drug treatment with  
782 mortality in older persons. *Epidemiology* **12**, 682–689 (2001).
- 783 50. Glynn, R. J., Schneeweiss, S., Wang, P. S., Levin, R. & Avorn, J. Selective prescribing led  
784 to overestimation of the benefits of lipid-lowering drugs. *J. Clin. Epidemiol.* **59**, 819–828  
785 (2006).
- 786 51. Hemmingsen, B. *et al.* Sulphonylurea monotherapy for patients with type 2 diabetes  
787 mellitus. *Cochrane Database Syst. Rev.* CD009008 (2013).
- 788 52. Rosenstock, J. *et al.* Effect of Linagliptin vs Placebo on Major Cardiovascular Events in  
789 Adults With Type 2 Diabetes and High Cardiovascular and Renal Risk: The CARMELINA  
790 Randomized Clinical Trial. *JAMA* **321**, 69–79 (2019).
- 791 53. Scirica, B. M. *et al.* Saxagliptin and cardiovascular outcomes in patients with type 2  
792 diabetes mellitus. *N. Engl. J. Med.* **369**, 1317–1326 (2013).
- 793 54. Rassen, J. A. *et al.* One-to-many propensity score matching in cohort studies.  
794 *Pharmacoepidemiol. Drug Saf.* **21 Suppl 2**, 69–80 (2012).
- 795 55. Rosenbaum, P. R. & Rubin, D. B. The central role of the propensity score in observational  
796 studies for causal effects. *Biometrika* **70**, 41–55 (1983).
- 797 56. Ge, T., Chen, C.-Y., Ni, Y., Feng, Y.-C. A. & Smoller, J. W. Polygenic prediction via  
798 Bayesian regression and continuous shrinkage priors. *Nat. Commun.* **10**, 1776 (2019).
- 799 57. International HapMap 3 Consortium *et al.* Integrating common and rare genetic variation in  
800 diverse human populations. *Nature* **467**, 52–58 (2010).



801 58. Mbatchou, J. *et al.* Computationally efficient whole-genome regression for quantitative and  
802 binary traits. *Nat. Genet.* **53**, 1097–1103 (2021).

803
